# Supplementary material for: Unrecognised myocardial infarction and its relationship to outcome in critically ill patients with cardiovascular disease
Source: Springer Nature journal article supplement (doi:10.1007/s00134-018-5425-0), 2018-10-29
Supplement: MOESM1 [file 16233936]

Online supplement:

Unrecognised myocardial infarction and its relationship to outcome in critically ill patients with cardiovascular disease

Annemarie B Docherty, Shirjel Alam, Anoop Shah, Alastair Moss, David Newby, Nicholas Mills, Simon Stanworth, Nazir Lone, Timothy S Walsh on behalf of the TROPICCAL Investigators

Table of contents

[Methods 2](#_Toc526450887)

[Exclusion criteria 2](#_Toc526450888)

[Consent procedures 2](#_Toc526450889)

[Data collection 2](#_Toc526450890)

[Variables 3](#_Toc526450891)

[Troponin I 3](#_Toc526450892)

[Electrocardiograms 3](#_Toc526450893)

[Definition of Injury Category 3](#_Toc526450894)

[APACHE II score 4](#_Toc526450895)

[SOFA Score 4](#_Toc526450896)

[Diagnoses 5](#_Toc526450897)

[Readmission to ICU 5](#_Toc526450898)

[Bias 5](#_Toc526450899)

[Study size 5](#_Toc526450900)

[Missing values 5](#_Toc526450901)

[Type 1 vs 2 MI aetiology: 5](#_Toc526450902)

[Statistical analysis: six month mortality 5](#_Toc526450903)

[Mediation analysis (Figure E1): 5](#_Toc526450904)

[Sensitivity analyses: 6](#_Toc526450905)

[Results 7](#_Toc526450906)

[Sensitivity analysis 11](#_Toc526450907)

Table of tables and figures

[Table E1: Definition of Cardiovascular Disease for TROPICCAL 2](#_Toc526450512)

[Table E2: Recruitment to TROPICCAL by NHS Trust site. 8](#_Toc526450513)

[Table E3: Chronic cardiac medication by cardiovascular subgroup. 8](#_Toc526450514)

[Table E4: ECG agreement for subgroup of 56 patients. 9](#_Toc526450515)

[Table E5: Evidence of supply-demand imbalance for patients diagnosed with Infarction. 10](#_Toc526450516)

[Table E6: Outcomes stratified by myocardial injury. 11](#_Toc526450517)

[Table E7: Multivariable Logistic Regression model for mortality at six months. 12](#_Toc526450518)

[Table E8: Sensitivity analyses: Odds ratios and 95% CI for logistic regression model with new myocardial injury category, excluding T wave inversion from the diagnostic criteria for Infarction. 12](#_Toc526450519)

[Figure E1: Directed Acyclic Graph. 6](#_Toc526450215)

[Figure E2: Recruitment to TROPICCAL 14](#_Toc526450216)

[Figure E3: Admission ECG characteristics and dynamic changes consistent with ischaemia. 15](#_Toc526450217)

[Figure E4: Change in cTnI concentrations stratified by patient peak creatinine 16](#_Toc526450218)

[Figure E5: TnI release in Injury and MI stratified by APS 16](#_Toc526450219)

[Figure E6: Mediation model 17](#_Toc526450220)

## Methods

Table E1: Definition of Cardiovascular Disease for TROPICCAL

| Cardiovascular Disease | The collective term for all diseases affecting the heart and blood vessels |
| --- | --- |
| Acute Coronary Syndrome | Acute Myocardial Infarction (MI)  Anginal symptoms Electrocardiographic changes consistent with ischemia  Biomarker elevation |
| Chronic Cardiac Disease | Ischemic Heart Disease  Left/Right/Congestive Cardiac Failure  Valvular disease (non-endocarditis associated)  Chronic arrhythmia on treatment  Hypertensive heart disease  Hypercholesterolaemic/hyperlipidaemic heart disease |
| Cerebrovascular Disease | Cerebrovascular Accident (CVA)  Transient Ischemic Attack (TIA) |
| Peripheral Vascular Disease | Abdominal Aortic Aneurysm (AAA) +/- Thoraco- (TAAA)  Vascular surgery  Symptoms of vascular insufficiency under vascular review |
| Age >75 with Diabetes or Hypertension | Type I or II Diabetes on medication  Hypertension on medication |

### Exclusion criteria

Exclusions were: palliative care, inter-ICU transfer, acute intracerebral pathology, age <18yrs, primary cardiac pathology, post cardiac arrest, post cardiac surgery, traumatic myocardial injury, or expected ICU stay <48 hours.

### Consent procedures

Screening was from patient histories and records. In the event of incapacity in Scotland, the patient's guardian/welfare attorney/nearest relative was approached for consent either in person or via telephone. In England, if the nearest relative (personal consultee) was present on the ICU, they were approached for agreement. If the relative was not present on the ICU, an independent consultant (nominated consultee) was approached for agreement. In cases where there was no personal consultee, or he/she was not contactable, the patient remained in the study based on the nominated consultee agreement, but we made every effort to contact the personal consultee.

### Data collection

Data was entered directly onto a secure, study specific database using REDCap: Research Electronic Data Capture (Vanderbildt University, USA).

#### Variables

Baseline demographic data were age, sex, hospital, comorbidity, (functional comorbidity index and APACHE comorbidities), APACHE II score, presenting diagnosis, admission type, cardiovascular comorbidity, and cardiovascular medication.

##### Troponin I

Daily TnI blood tests were retrieved from existing blood samples. Samples were processed locally in real time at the following hospitals which had the ARCHITECT STAT high-sensitive troponin I assay: Royal Infirmary Edinburgh, the Western General Hospital, Edinburgh, the Queen Elizabeth University Hospital, Glasgow, University Hospital of South Manchester, John Radcliffe Hospital Oxford, and Bolton NHS Foundation Trust. All TnI assays were performed within 72 hours of being drawn from the patient. We collected samples from sites that did not have the Abbott Highly Sensitive Troponin Assay, and stored them at -80C for batch analysis of TnI in NHS Lothian. Hospitals that stored TnI were Newcastle Hospitals NHS Foundation Trust (The Freeman Hospital and the Royal Victoria Infirmary), East Lancashire Hospital Trust, Salford Royal NHS Foundation Trust, Guys and St Thomas’ Hospital London, Portsmouth Hospitals NHS Trust and Brighton and Sussex University Trust. In these hospitals, specimens were collected from routine blood samples which were stored at 2-8°C within 72 hours.

##### Electrocardiograms

ECG interpretation was independently performed by three senior cardiology research fellows, who each had at least ten years of postgraduate medical experience. All were blinded to clinical information and TnI results. The first 56 patients’ ECGs were reviewed by two cardiologists, and assessed for agreement. For the admission ECG, the cardiologists were asked to classify the ECG as normal/abnormal, and to classify abnormalities as ST elevation (new ST elevation at the J-point in two contiguous leads with the cut-off points: ≥0.2mV in men or ≥0.15mV in women in leads V2-V3 and/or ≥0.1mV in other leads) or presumed new left bundle branch block (LBBB), ST depression and T wave inversion (new horizontal or down-sloping ST depression ≥0.05mV in two contiguous leads; and/or T inversion ≥0.1mV in two contiguous leads with prominent R-wave or R/S ratio >1), pathological Q waves and RBBB in accordance with the Third Universal Definition of myocardial infarction. These parameters were chosen a priori, and are a standard approach to reading ECGs for acute changes potentially associated with ischaemia[8]. These abnormalities may be chronically present on ECGs in patients with co-existing cardiovascular disease, and their presence on one ECG does not therefore indicate acute ischemia. Dynamic changes on serial ECGs are essential for the diagnosis of myocardial ischemia. They were also asked to comment on the rhythm: normal sinus rhythm, sinus rhythm with heart rate >100 beats per minute, atrial fibrillation or flutter, other supraventricular tachycardia, or 2nd/3rd degree heart block. For subsequent ECGs, the cardiologists were asked if it differed from the admission ECG, and abnormalities were classified as above. They were also asked to give an overall impression of whether the changes on each patient’s serial ECGs represented ischemia.

##### Definition of Injury Category

MI was defined as TnI above the sex-specific upper reference limit with ≥20% rise and/or fall in cTnI concentrations, with evidence of dynamic ECG abnormalities suggesting ischaemia. Acute myocardial injury was defined as ≥20% rise and/or fall in cTnI, without ECG signs of ischaemia. Chronic myocardial injury was defined as a persistently elevated cTnI (<20% change) with no evidence of ischaemia. Patients in whom cTnI remained within the reference range and had no signs of ischaemia were defined as no injury [3].

Examples of each category:

MI: TnI of 130 on admission and two days later TnI was 160 (>20% rise) with ischaemic changes on serial ECGs

MI: TnI of 130 on admission and two days later TnI was 100 (>20% fall) with ischaemic changes on serial ECGs

Acute Injury: TnI of 130 and two days later TnI was 160 or 100 with no ischaemic changes on serial ECGs

Chronic Injury: TnI of 130ng/l on admission and two days later TnI was 136 (with or without ECG changes)

No Injury: TnI of 5 on admission and two days later TnI was 10

Lactate: Lactate was recorded in all sites, from samples taken for clinical indication. We recorded the worst (highest) lactate level in the 24 hours preceding the troponin sample, as measured on an arterial blood gas.

Age: Age was entered as a continuous variable in all models. We divided age by 10 for estimates of relative risk or odds as this is clinically more meaningful.

Diagnosis: Diagnoses were recorded as APACHE III diagnostic codes in Scotland, and ICNARC diagnostic codes in England.

Type of admission: This was recorded as elective surgical, emergency surgical, and non-operative. Patients who were admitted after elective or emergency cardiac intervention (angioplasty or cardiac surgery) were excluded.

Comorbidity: We recorded severe comorbidity using APACHE II comorbidities. We also recorded comorbidity using the functional comorbidity index (FCI).

Cardiac medication: We recorded the presence/absence of the following long-term cardiac medication: beta blocker, angiotensin converting enzyme inhibitor (ACE-I) or angiotensin receptor blocker, calcium channel blocker, diuretic, anti-platelet, warfarin, statin, other.

Severity of illness scoring: We have used two methods to score severity of illness: The APACHE II score for the first 24 hours of ICU admission, and the SOFA score for daily illness severity measurement:

##### APACHE II score

The APACHE II score (Acute Physiological and Chronic Health Evaluation II) is a measure of patient severity of illness within the first 24 hours of admission to ICU[9]. It combines 12 routine physiological variables with chronic health status and age to provide a general measure of disease severity (Chapter 3). This data is routinely entered by clinical staff in ICU in Scotland, and instructions were given to the research staff in England on how to calculate it. The range is 0-71, and an increasing score is associated with subsequent risk of hospital death. The APACHE II score can then be combined with presenting diagnosis and requirement for emergency surgery to give a predicted mortality. We kept APACHE II in as a continuous variable. In addition, we categorised patients into “Less Severely Ill” and “More Severely Ill”, using the median APACHE II Score as the cut value.

##### SOFA Score

The SOFA Score (Sequential [or “Sepsis”] Organ Failure Assessment) score is not restricted to the first 24 hours of ICU admission, and can be performed on a daily basis[10]. It is made up of six variables, each representing an organ system. The worst physiological parameter for each variable in a 24 hour period is assigned a score 0-4, with a maximum total score of 24. Physiological variables included in the tables are therefore those that were collected as part of the SOFA score.

##### Diagnoses

We mapped APACHE III codes onto ICNARC codes. Due to the low frequency within each sub-category, and the requirement to reduce the categories for entry into regression models, we classified diagnosis by ICNARC system: “respiratory”, “cardiovascular”, “gastrointestinal”, “genito-urinary” and “other”. Acute intracerebral pathology was an exclusion criterion, but we still included patients admitted after back, or neck surgery or injury who were classified by ICNARC or APACHE as “neurological”.

##### Readmission to ICU

Patients could only be entered into the study once, during their index ICU admission. If the patient was readmitted to ICU within 48 hours of ICU discharge, this was counted in the first ICU stay. Other ICU readmissions were included in the hospital length of stay.

#### Bias

We excluded patients who were admitted with primary cardiac diagnoses and non-cardiac diagnoses which are known to be associated with TnI elevation, including myocardial trauma, and acute intracerebral pathology. We also excluded patients in whom treatment was being withdrawn, as we felt it was inappropriate to approach them or their relatives. Finally, we did not include patients who were expected to stay less than 48 hours in ICU, as we would have minimal information regarding severity of illness scoring, or ECGs. We are therefore unable to generalise our findings to these patients.

#### Study size

We originally planned to recruit 150 patients, however TROPICCAL was adopted onto the CRN portfolio in England and we were therefore able to extend our study to other sites and continue recruitment for 18 months.

#### Missing values

Our three main variables of interest for our multivariate analyses were TnI, APACHE score and lactate. TnI was missing in six (2.2%) patients due to miscommunication with local laboratories, APACHE score was also missing in six (2.2%) patients, due to lack of local data entry, and lactate in the 24 hours before peak TnI was missing in 10 (3.6%) patients. We recorded lactate from routinely taken arterial or venous blood samples, and these patients did not have lactate taken in the 24 hours before peak TnI. We did not think that this influenced our outcomes, and we have concluded that the data were missing at random (MAR). We used multivariate imputation by chained equation to impute multiple possible values for each missing value[9]. This is superior to single imputation in that it takes into account the uncertainty in missing value imputation. We imputed five datasets. We used predictive mean matching for continuous variables, and logistic regression for binary variables. Variables included in the imputation were predictive of missingness, associated with the variable being imputed and the outcome variable of the analysis[10].

#### Type 1 vs 2 MI aetiology:

We used the components of the SOFA score in the 24 hours preceding MI to assess the likelihood of Type 1 vs Type 2 MI. These components were severity of oxygenation impairment (PaO2/FiO2 ratio), requirement for vasopressor support, lowest mean arterial pressure, arterial lactate concentration, haemoglobin concentration, and severity of renal dysfunction (creatinine concentration).

#### Statistical analysis: six month mortality

##### Mediation analysis (Figure E1):

Model-based causal mediation analysis proceeds in two steps. First we specified two statistical models:

- The mediator model for the conditional distribution of the mediator (“MI”) given the exposure (“APS”) and a set of the observed pre-treatment covariates (admission type, sex, presenting diagnosis, APACHE comorbidity).
- The outcome model for the conditional distribution of the outcome (mortality at six months) given the mediator, exposure and covariates.

These models were fitted separately and then their fitted objects comprised the main inputs to the mediation function which then returned the estimates of the average causal mediation effects along with other causal quantities of interest.

Variables with significant univariable association: APS, MI, admission type. Clinically important variables: sex, presenting diagnosis. We included an interaction term for APS*MI as the association between MI and mortality may be different dependent on the severity of physiological derangement.

We used the linear regression fit with least squares and the probit regression for the mediator and outcome models respectively. We allowed for heteroscedastisticy of the covariance matrix, and performed 1000 simulations using the Monte Carlo method.


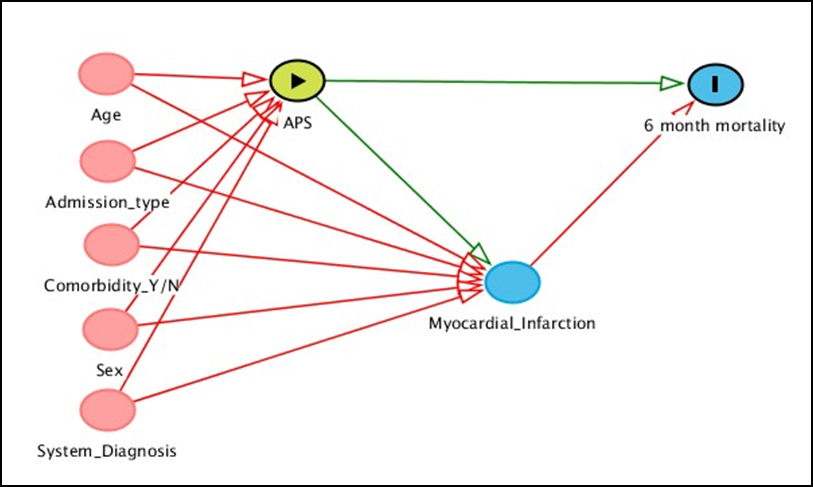


Figure E1: Directed Acyclic Graph. **Exposure**: APS (Acute Physiological Score), **Mediator**: MI, **Outcome**: 6 month mortality. **Covariates**: Age, Admission type (Elective surgery/emergency surgery/non-operative), comorbidity (APACHE comorbidity yes/no), Sex, system diagnosis (respiratory, cardiovascular, gastrointestinal, renal, other)

#### Sensitivity analyses:

We undertook sensitivity analyses that excluded T wave inversion from the definition of myocardial ischaemia, because this was found to have low inter-cardiologist reliability (see eSupplement).

## Results

Table E2: Recruitment to TROPICCAL by NHS Trust site.

|  | **Total screened** | **Pts with CVD** | **%** | **Recruited** | **Months in study** | **Recruit/month** |
| --- | --- | --- | --- | --- | --- | --- |
| Bolton | 208 | 45 | 21.6 | 6 | 3 | 2.0 |
| Brighton | 173 | 26 | 15.0 | 8 | 2 | 4.0 |
| GSTT | 1295 | 225 | 17.4 | 46 | 9 | 5.1 |
| ELHT | 1091 | 334 | 30.6 | 23 | 12 | 1.9 |
| Newcastle | 1119 | 304 | 27.2 | 18 | 8 | 2.3 |
| Salford | 507 | 70 | 13.8 | 11 | 5 | 2.2 |
| UHSM | 368 | 113 | 30.7 | 22 | 8 | 2.8 |
| Lothian | 1769 | 296 | 16.7 | 117 | 18 | 6.6 |
| Oxford | 582 | 167 | 28.7 | 18 | 9 | 2.0 |
| Portsmouth | 496 | 173 | 34.9 | 11 | 4 | 2.8 |
| Glasgow | 108 | 34 | 31.5 | 2 | 1 | 2.0 |
| Total | 7716 | 1787 | 23.2 | 282 |  |  |

Table E3: Chronic cardiac medication by cardiovascular subgroup. Patients could present with ACS in the context of a different main diagnosis. ACS Acute Coronary Syndrome, CCD Chronic cardiac disease, CVA/TIA Cerebrovascular accident/Transient ischemic attack, PVD peripheral vascular disease, DM/BP Diabetes mellitus/hypertension. CAD coronary artery disease, CCF congestive cardiac failure. ACE-I Ace Inhibitor

|  | **n** | **No meds**  **%** | | **Beta blocker**  **%** | | **ACE-I**  **%** | | **Anti-plt/warfarin**  **%** | | **Statin**  **%** | |
| --- | --- | --- | --- | --- | --- | --- | --- | --- | --- | --- | --- |
| Total | 279 | 24 | (8.6) | 115 | (41.2) | 110 | (39.4) | 156 | (55.9) | 138 | (49.5) |
| Inclusion Criteria | |  |  |  |  |  |  |  |  |  |  |
| ACS | 22 | 0 | (0.0) | 10 | (45.5) | 8 | (36.4) | 14 | (63.6) | 14 | (63.6) |
| CCD | 174 | 11 | (6.3) | 87 | (50.0) | 70 | (40.2) | 115 | (66.1) | 82 | (47.1) |
| CVA/TIA | 42 | 5 | (11.9) | 19 | (45.2) | 12 | (28.6) | 30 | (71.4) | 21 | (50.0) |
| PVD | 55 | 6 | (10.9) | 18 | (32.7) | 21 | (38.2) | 32 | (58.2) | 31 | (56.4) |
| 75 DM/BP | 90 | 4 | (4.4) | 31 | (34.4) | 38 | (42.2) | 44 | (48.9) | 45 | (50.0) |
| Chronic Cardiac Disease (CCD) Subcategories | | | | |  |  |  |  |  |  |  |
| CAD | 67 | 3 | (4.5) | 32 | (47.8) | 28 | (41.8) | 46 | (68.7) | 44 | (65.7) |
| CCF | 27 | 2 | (7.4) | 13 | (48.1) | 10 | (37.0) | 21 | (77.8) | 13 | (48.1) |
| Valvular disease | 26 | 4 | (15.4) | 12 | (46.2) | 8 | (30.8) | 20 | (76.9) | 9 | (34.6) |
| Arrhythmia | 65 | 2 | (3.1) | 39 | (60.0) | 28 | (43.1) | 49 | (75.4) | 32 | (49.2) |
| Hypertensive | 58 | 2 | (3.4) | 30 | (51.7) | 25 | (43.1) | 42 | (72.4) | 22 | (37.9) |
| Hypercholerol | 13 | 1 | (7.7) | 7 | (53.8) | 4 | (30.8) | 9 | (69.2) | 10 | (76.9) |

Table E4: ECG agreement for subgroup of 56 patients. Independent interpretation by Reader 1 and Reader 2 (Cardiology research fellows each of whom had over ten years of postgraduate experience). Abnormalities reported by patient (i.e Tw inversion=13 means 13 separate patients with Tw inversion). Kappa statistic for agreement.

|  | **Reader 1** | **Reader 2** | **kappa** |
| --- | --- | --- | --- |
| n | 56 | 56 |  |
| Baseline ECG abnormal y/n | 25 | 38 | 0.390 |
| ST elevation | 7 | 5 | 0.628 |
| ST depression | 6 | 11 | 0.249 |
| Tw inversion | 6 | 16 | 0.138 |
| Q waves | 0 | 0 | - |
| RBBB | 5 | 6 | 0.698 |
| Ischemic changes on ECG (Y) | 24 | 27 | 0.890 |
| ST elevation | 2 | 0 | - |
| ST depression | 2 | 3 | 0.217 |
| Tw inversion | 6 | 13 | 0.223 |
| Q waves | 0 | 1 | - |
| RBBB | 1 | 1 | 0.665 |

Table E5: Evidence of supply-demand imbalance for patients diagnosed with Infarction. Each line represents a separate patient with worst physiological value for each variable in the 24 hours preceding the peak TnI. Physiological variables were collected as part of the daily SOFA score. Vasopressors: “Low”: dopamine=< 5mcg/kg/min or dobutamine (any dose); “medium” dopamine>5 or Adrenaline =< 0.1 or Noradrenaline =< 0.1; “high” Dopamine>15 or Adr>0.1 or Norad >0.1mcg/kg/min.

| Patient no. | Peak cTnI (ng/) | Pfratio (kPa) | lowest MAP (mmHg) | Vasopressors | Lactate (mmol/l) | Hb (g/l) | Creatinine (micromol/l) |
| --- | --- | --- | --- | --- | --- | --- | --- |
| 76 | 26 | 19 | 98 | medium | 0.6 | 98 | 194 |
| 73 | 31 | 43 | 57 | high | 7.4 | 128 | 334 |
| 58 | 34 | 14 | 74 | medium | 2.9 | 123 | 429 |
| 14 | 44 | 39 | 55 | high | 2.1 | 114 | 264 |
| 83 | 47 | 26 | 57 | medium | 1.1 | 136 | 75 |
| 16 | 71 | 16 | 79 | high | 0.8 | 88 | 45 |
| 36 | 74 | 8 | 51 | medium | 2.1 | 112 | 131 |
| 154 | 79 | 45 | 46 | high | 3.8 | 72 | 153 |
| 193 | 83 | 44 | 85 | high | 1.2 | 89 | 94 |
| 69 | 101 | 58 | 58 | high | 1.5 | 142 | 198 |
| 207 | 114 | 33 | 54 | medium | 1.3 | 87 | 47 |
| 13 | 114 | 29 | 63 | high | 0.7 | 90 | 60 |
| 118 | 125 | 14 | 88 | high | 1.9 | 74 | 106 |
| 224 | 126 | 43 | 76 | medium | 0.8 | 82 | 406 |
| 102 | 135 | 27 | 65 | high | 6.2 | 90 | 67 |
| 61 | 139 | 44 | 94 | medium | 13.3 | 151 | 92 |
| 263 | 139 | 28 | 74 | high | 3.0 | 79 | 88 |
| 75 | 139 | 13 | 51 | high | 3.0 | 107 | 311 |
| 171 | 148 | 51 | 73 | medium | 0.7 | 92 | 113 |
| 107 | 148 | 33 | 65 | high | 1.9 | 92 | 110 |
| 64 | 160 | 46 | 54 | high | 8.2 | 124 | 145 |
| 22 | 168 | 58 | 99 | high | 8.6 | 193 | 213 |
| 261 | 170 | 46 | 93 | high | 0.6 | 118 | 113 |
| 31 | 172 | 25 | 58 | medium | 2.7 | 104 | 135 |
| 11 | 191 | 5 | 76 | medium | 1.6 | 114 | 59 |
| 7 | 197 | 29 | 109 | medium | 1.2 | 83 | 313 |
| 136 | 197 | 36 | 93 | medium | 1.4 | 72 | 375 |
| 212 | 202 | 23 | 79 | medium | 2.7 | 82 | 183 |
| 194 | 208 | 28 | 67 | medium | 3.0 | 106 | 300 |
| 265 | 228 | 7 | 81 | medium | 5.0 | 119 | 135 |
| 34 | 321 | 36 | 57 | medium | 3.0 | 113 | 204 |
| 109 | 348 | 45 | 76 | high | 3.3 | 74 | 135 |
| 225 | 355 | 20 | 60 | high | 2.5 | 80 | 98 |
| 226 | 365 | 22 | 63 | medium | 2.5 | 150 | 74 |
| 116 | 375 | 16 | 78 | high | 1.1 | 76 | 58 |
| 62 | 412 | 57 | 99 | medium | 3.5 | 116 | 478 |
| 273 | 600 | 10 | 54 | high | 2.35 | 104 | 198 |
| 52 | 621 | 42 | 109 | medium | 1.6 | 119 | 207 |
| 74 | 630 | 45 | 60 | high | 2.8 | 116 | 358 |
| 26 | 662 | 50 | 70 | high | 1.5 | 85 | 143 |
| 38 | 675 | 44 | 60 | medium | 0.9 | 105 | 66 |
| 5 | 684 | 16 | 73 | high | 1.1 | 94 | 151 |
| 166 | 739 | 9 | 50 | high | 5.2 | 103 | 134 |
| 131 | 843 | 58 | 70 | high | 13.3 | 54 | 338 |
| 18 | 884 | 43 | 99 | high | 1.1 | 79 | 77 |
| 20 | 921 | 24 | 74 | medium | 1.5 | 70 | 133 |
| 45 | 976 | 47 | 75 | high | 1.4 | 66 | 599 |
| 128 | 1132 | 20 | 58 | medium | 2.2 | 170 | 621 |
| 187 | 1132 | 22 | 65 | medium | 0.8 | 85 | 478 |
| 119 | 1280 | 14 | 80 | high | 2.2 | 88 | 273 |
| 97 | 1351 | 16 | 62 | high | 2.3 | 116 | 126 |
| 163 | 1400 | 20 | 55 | high | 7.0 | 94 | 160 |
| 103 | 1601 | 36 | 68 | high | 2.7 | 137 | 259 |
| 262 | 1632 | 14 | 66 | high | 2.4 | 118 | 150 |
| 54 | 1692 | 14 | 77 | medium | 2.4 | 96 | 266 |
| 264 | 1701 | 58 | 50 | medium | 2.2 | 115 | 253 |
| 27 | 1710 | 33 | 58 | medium | 2.1 | 67 | 180 |
| 3 | 1935 | 34 | 60 | high | 2.3 | 123 | 200 |
| 164 | 1982 | 25 | 68 | high | 4.5 | 120 | 282 |
| 158 | 2202 | 17 | 60 | high | 7.4 | 81 | 136 |
| 47 | 2729 | 47 | 63 | medium | 1.4 | 106 | 407 |
| 95 | 5733 | 30 | 60 | medium | 3.0 | 78 | 116 |
| 80 | 7776 | 15 | 65 | high | 9.3 | 95 | 219 |
| 90 | 11422 | 58 | 48 | medium | 7.0 | 89 | 160 |
| 239 | 14975 | 9 | 72 | medium | 1.4 | 89 | 239 |
| 122 | 19864 | 45 | 72 | high | 1.5 | 95 | 148 |
| 50 | 39602 | 14 | 56 | high | 3.6 | 118 | 152 |
| 6 | 47085 | 35 | 70 | high | 2.8 | 101 | 290 |

Table E6: Outcomes stratified by myocardial injury. Categorical n(%) p value Chi2 test, continuous median(Q0,Q1,Q3,Q4). p value Injury vs Infarction = Kruskal-Wallis

|  | **No injury**  **%** | | **Injury**  **%** | | **Infarction**  **%** | | **P**  Injury vs Infarction |
| --- | --- | --- | --- | --- | --- | --- | --- |
| **N** | 84 |  | 126 |  | 66 |  |  |
| ICU mortality | 4 | (4.8) | 22 | (17.5) | 11 | (16.7) | 0.930 |
| Hospital mortality | 8 | (9.5) | 30 | (23.8) | 21 | (31.8) | 0.163 |
| 6 month mortality | 14 | (16.7) | 39 | (31.0) | 24 | (36.4) | 0.420 |
| MV duration | 1 | (0, 0, 4, 33) | 2 | (0, 0, 5, 31) | 4 | (0, 2, 7, 39) | 0.001 |
| ICU LOS | 5 | (0, 3, 9, 53) | 7 | (0, 4, 10, 36) | 7 | (0, 4, 13, 43) | 0.380 |
| Hospital LOS | 17 | (3, 11, 26, 125) | 18 | (1, 10, 31, 157) | 21 | (2, 11, 39, 118) | 0.318 |

Table E7: Multivariable Logistic Regression model for mortality at six months. R2= 0.192, LR39.62, c-index 0.729. Odds ratios with 95% confidence intervals presented. Variables with significant associations with six month mortality were lactate, nadir haemoglobin, and myocardial injury category.

|  | **OR** | **Lower 0.95** | **Upper 0.95** | **p value** |
| --- | --- | --- | --- | --- |
| Age | 1.22 | 0.85 | 1.75 | 0.279 |
| Comorbidity | 1.68 | 0.81 | 3.51 | 0.165 |
| Admission type (ref: Elective Surgery) | | |  |  |
| Emergency Surgery | 0.44 | 0.17 | 1.17 | 0.095 |
| Non Operative | 1.32 | 0.58 | 3.00 | 0.506 |
| Lactate | 1.34 | 1.03 | 1.76 | 0.029 |
| Nadir Hb | 0.58 | 0.37 | 0.91 | 0.019 |
| Female | 1.41 | 0.75 | 2.65 | 0.285 |
| Myocardial Injury (ref: "No Injury") | | |  |  |
| Injury | 2.28 | 1.06 | 4.92 | 0.035 |
| Infarction | 2.7 | 1.11 | 6.55 | 0.028 |
| Diagnosis (ref: "Respiratory") | | |  |  |
| CVS | 0.91 | 0.36 | 2.28 | 0.832 |
| GI | 0.65 | 0.28 | 1.51 | 0.32 |
| Renal | 1.06 | 0.4 | 2.78 | 0.909 |
| Other | 0.85 | 0.31 | 2.32 | 0.757 |

### Sensitivity analysis

Seventeen patients had isolated dynamic T-wave inversion on their ECGs. Removal of T wave inversion from the definition of MI did not change the median (1st, 3rd quartile) peak cTnI significantly for each group (injury: 160ng/l (74, 554); infarction 365ng/l (117, 1768). There was a greater six month mortality for the MI group after excluding T-wave inversion (40.4%, 95%CI 44.3 to 73.6) compared with MI that included T-wave inversion (36.4%, 95%CI 24.9 to 49.1). The sensitivity analysis did not significantly change the findings from the multivariable analysis (table E9).

Table E8: Sensitivity analyses: Odds ratios and 95% CI for logistic regression model with new myocardial injury category, excluding T wave inversion from the diagnostic criteria for Infarction. R2=0.144, c-index=0.699)

|  | **OR** | **Lower 0.95** | **Upper 0.95** | **p value** |
| --- | --- | --- | --- | --- |
| Age | 1.22 | 0.85 | 1.75 | 0.29 |
| Comorbidity | 1.77 | 0.85 | 3.71 | 0.13 |
| Admission type (ref: Elective Surgery) | | |  |  |
| Emergency Surgery | 0.48 | 0.19 | 1.20 | 0.119 |
| Non Operative | 1.39 | 0.62 | 31.50 | 0.418 |
| Lactate | 1.13 | 1.01 | 1.25 | 0.03 |
| Nadir Hb | 0.81 | 0.68 | 0.97 | 0.021 |
| Female | 1.42 | 0.76 | 2.65 | 0.275 |
| Myocardial Injury (ref: "No Injury") | | |  |  |
| Injury | 1.81 | 0.85 | 3.83 | 0.124 |
| Infarction | 2.37 | 1.00 | 5.61 | 0.050 |
| Diagnosis (ref: "Respiratory") | | |  |  |
| CVS | 0.97 | 0.39 | 2.44 | 0.956 |
| GI | 0.66 | 0.29 | 1.52 | 0.331 |
| Renal | 1.03 | 0.39 | 2.71 | 0.952 |
| Other | 0.87 | 0.32 | 2.35 | 0.778 |


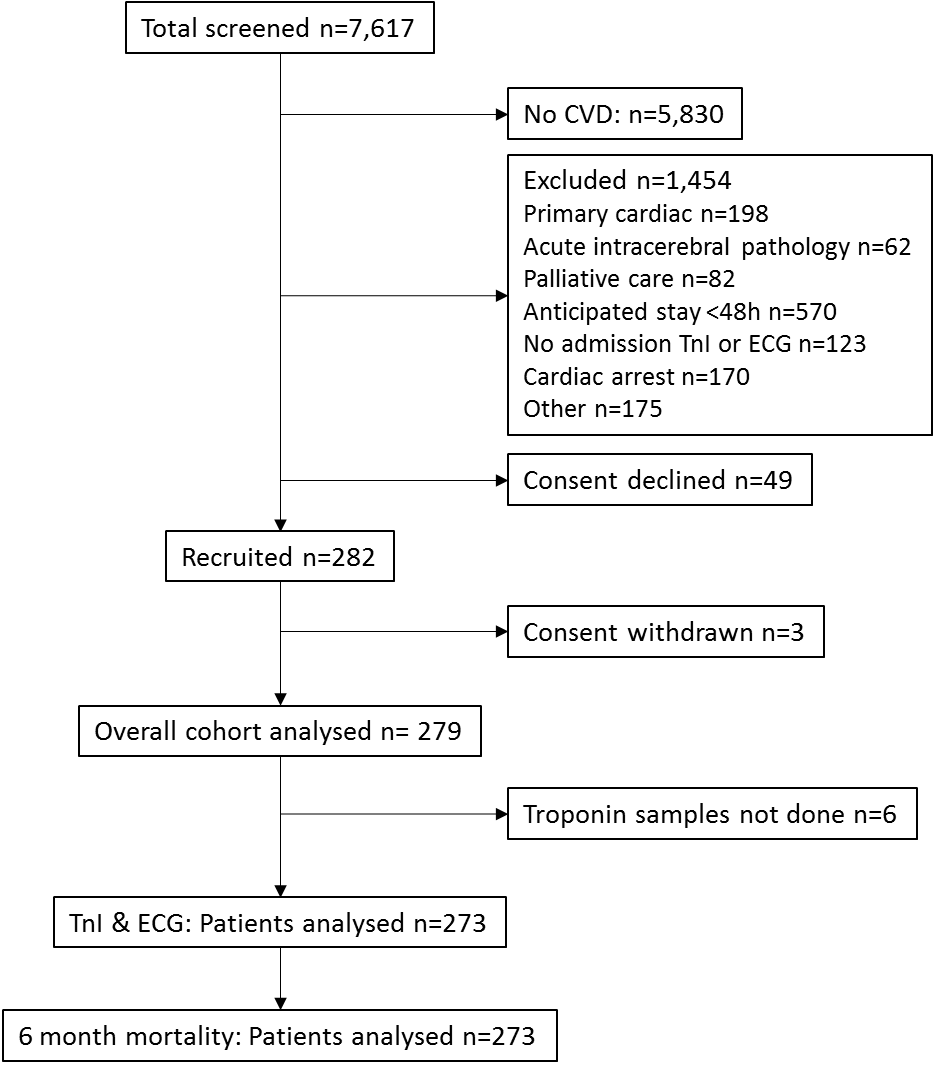


Figure E2: Recruitment to TROPICCAL (TROPonin I in Cardiovascular patients in CriticAL care)


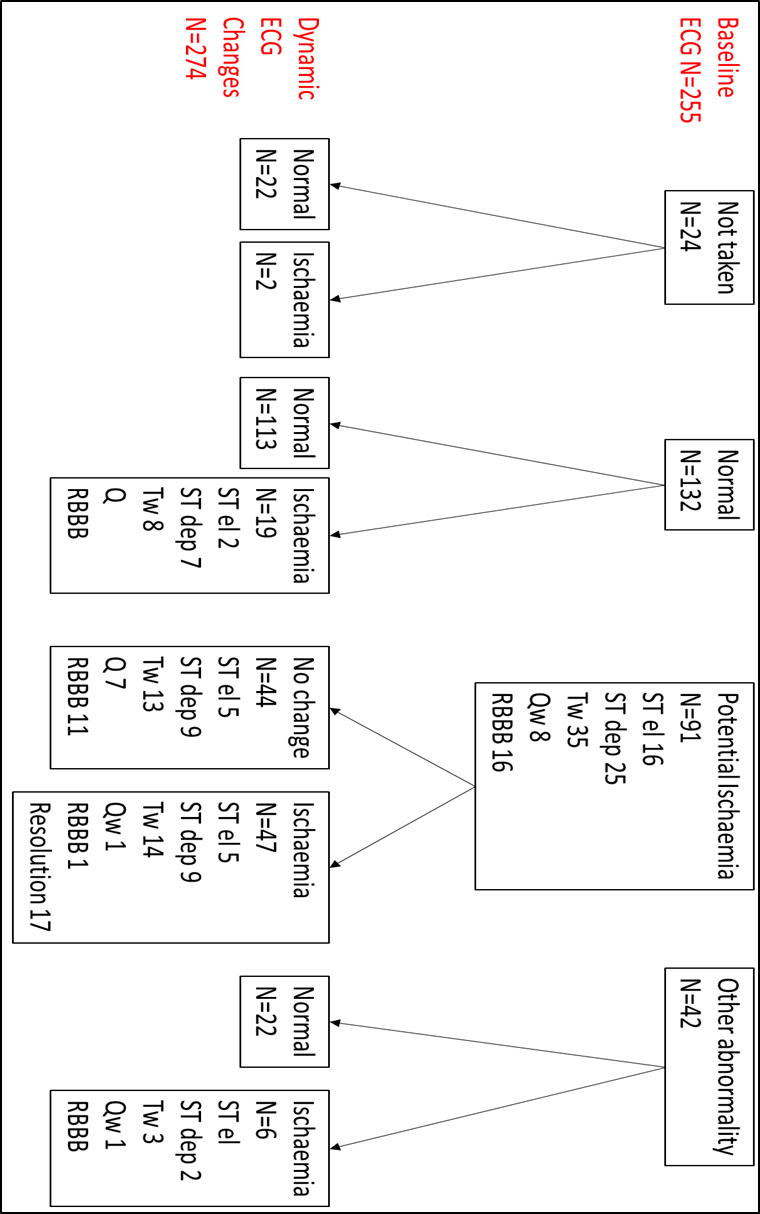


Figure E3: Admission ECG characteristics and dynamic changes consistent with ischaemia.


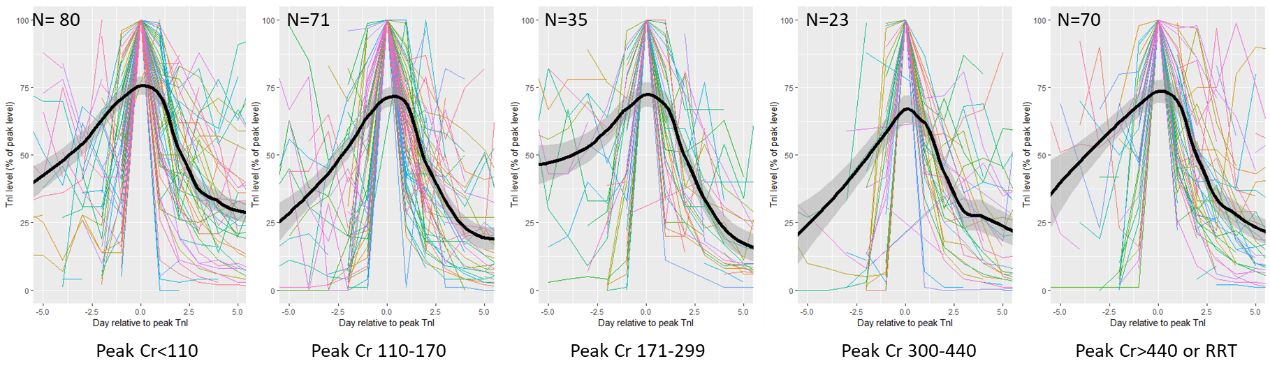


Figure E4: Change in cTnI concentrations centred around the peak concentration on percentage scale. Each coloured line represents a separate patient. The black line represents the “average” patient (the smoothed conditional mean with 95% confidence intervals). Plots stratified by patient peak creatinine as per renal SOFA score.


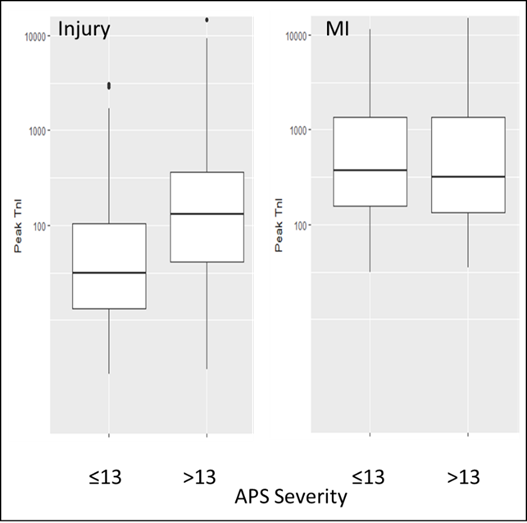


Figure E5: TnI release was lower in the Injury patients versus the MI patients for the lower APS sub-group, but substantially higher in the Injury patient (and similar to MI patients) in the higher APS sub-group


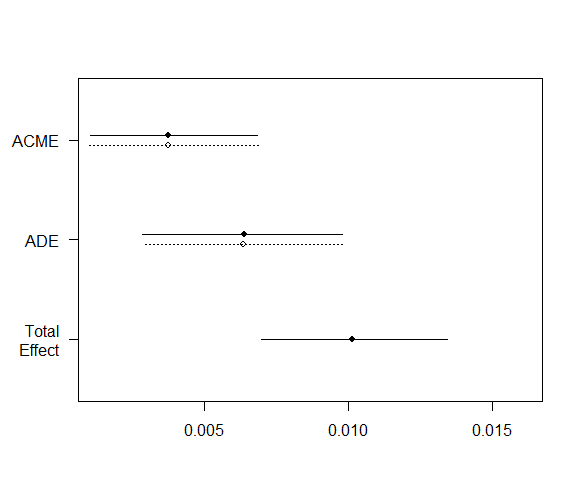


Figure E6: The mediation model suggested that APS (“Exposure”, Estimate 0.114, p=0.0005) and MI (“Mediator”, Estimate 2.50, p=0.006) were significantly associated with mortality at six months (“Outcome”). Mediation analysis estimated that 63.0% of the effect on six month mortality from APS lay on the direct route (Average Direct Effect: b=0.006007, 95% CI 0.0032 to 0.01009, p=0.00110), but 37.04.2% of the effect was mediated through MI (Average Causal Mediation Effect: b=0.00385, 95% CI 0.001 to 0.007, p=<0.00120).

R code

#mediation analysis

model.0 <- glm(ms_6m ~ aps + age + adm_type + comorb_yn + gender + diag_sys, df, family = binomial("probit"))

summary(model.0)

model.M <- glm(mi ~ aps + age + adm_type + comorb_yn + gender + lactate + hb_low + diag_sys, df, family = gaussian())

summary(model.M)

model.Y <- glm(ms_6m ~ aps*mi + age + adm_type + comorb_yn + gender+ lactate + hb_low + diag_sys, df, family=binomial("probit"))

summary(model.Y)

results <- mediate(model.M, model.Y, treat="aps", mediator="mi",

boot=TRUE, sims = 1000)

summary(results)
